# Supplementary material for: A simple way to prepare Au@polypyrrole/Fe3O4hollow capsules with high stability and their application in catalytic reduction of methylene blue dye
Source: Royal Society of Chemistry journal article supplement (doi:10.1039/c4nr00023d), 2014-01-01

**Supplementary Information**

**A simple way to prepare Au@polypyrrole/Fe<sub>3</sub>O<sub>4</sub> hollow capsules with high stability and their application in catalytic reduction of methylene blue dye**

**Tongjie Yao,<sup>a</sup> Tieyu Cui,<sup>\*a</sup> Hao Wang,<sup>a</sup> Linxu Xu,<sup>a</sup> Fang Cui<sup>a</sup> and Jie Wu<sup>\*b</sup>**

**Fig. S1** Energy-dispersive X-ray absorption (EDX) spectroscopy of the Au@PPy/Fe<sub>3</sub>O<sub>4</sub> hollow capsules. The signal of Si raise from detector of TEM, while Cu is attributed to the sample grid film. It is necessary to mention that the signal of C partly raise from PPy shell and partly raise from grid film.

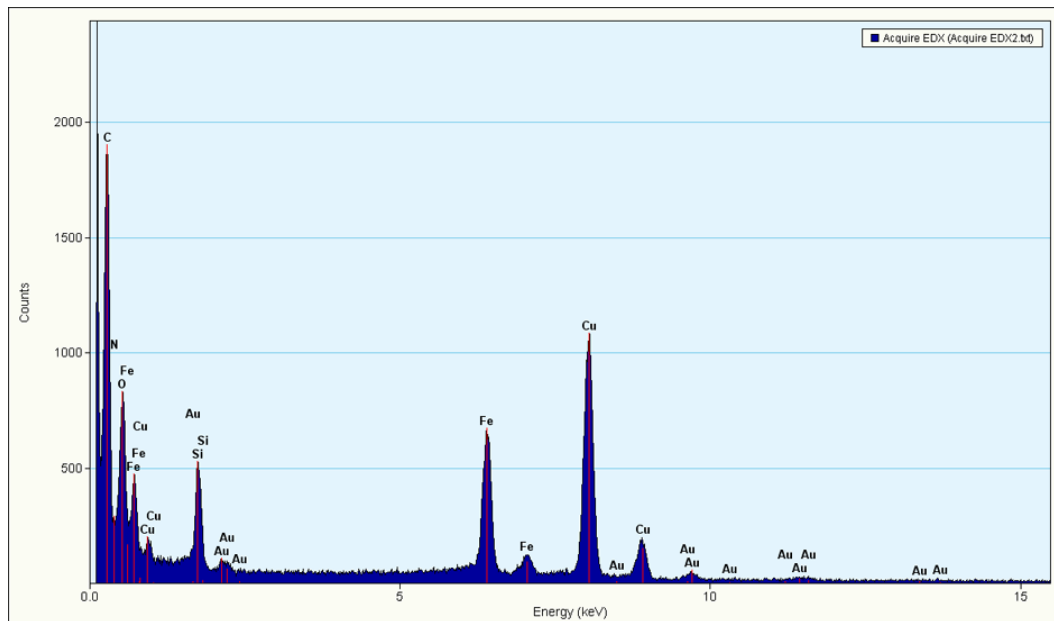

**Fig. S2** High-resolution Fe 2p XPS spectrum of Au@PPy/Fe<sub>3</sub>O<sub>4</sub> hollow capsules.

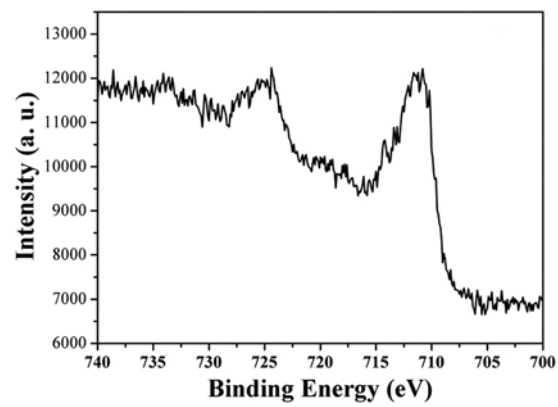

**Fig. S3** Magnetization curves at 5 K of Au@PPy/Fe<sub>3</sub>O<sub>4</sub> hollow capsules. The magnetization at 5 K is 31.6, 39.3 and 40.4 emu/g for samples prepared with 10, 30 and 50 mg FeCl<sub>2</sub>·4H<sub>2</sub>O, respectively.

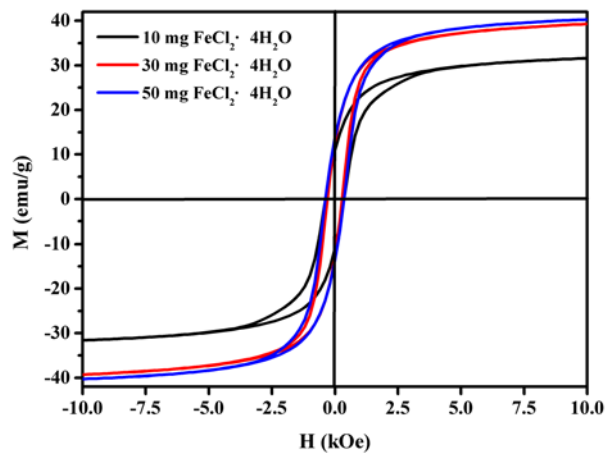

**Fig. S4** The rate constant  $k$  of precursor PS/Au composites estimated by the slopes of straight lines of  $\ln(A_t/A_0)$  vs. reaction time.

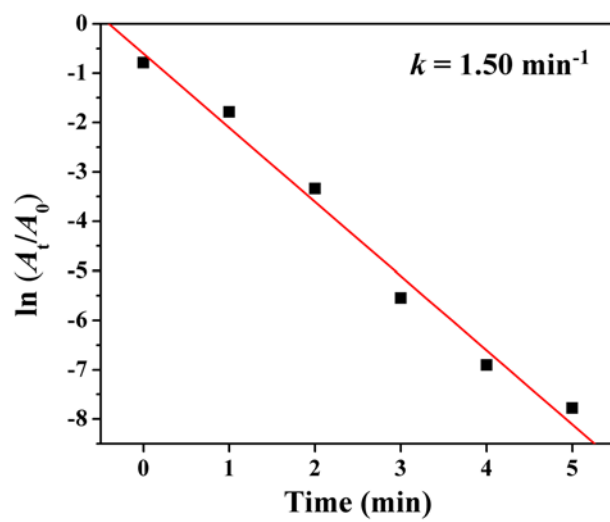

**Fig. S5** UV-Vis spectra of the MB dye and NaBH<sub>4</sub> mixture in absence of catalysts at different times. Inset shows the rate constant  $k$  estimated by the slopes of straight lines of  $\ln(A_t/A_0)$  vs. reaction time.

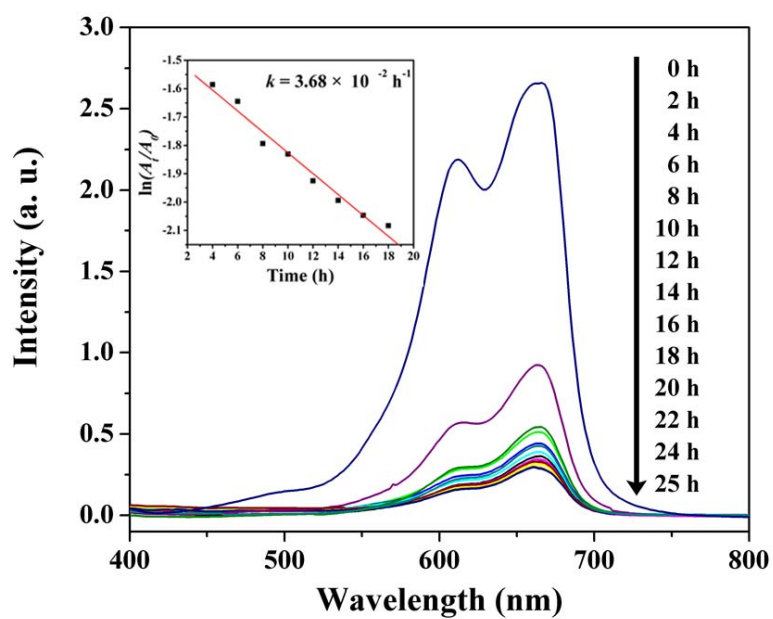

**Fig. S6** The rate constant  $k$  estimated by the slopes of straight lines of  $\ln(A_t/A_0)$  vs. reduction time using 0.1 mg catalysts at different reused circles: (a) 2<sup>nd</sup>; (b) 3<sup>rd</sup>; (c) 4<sup>th</sup>; and (d) 5<sup>th</sup>. Here, the time that catalytic reaction started is set as the beginning time ( $t = 0$ ).

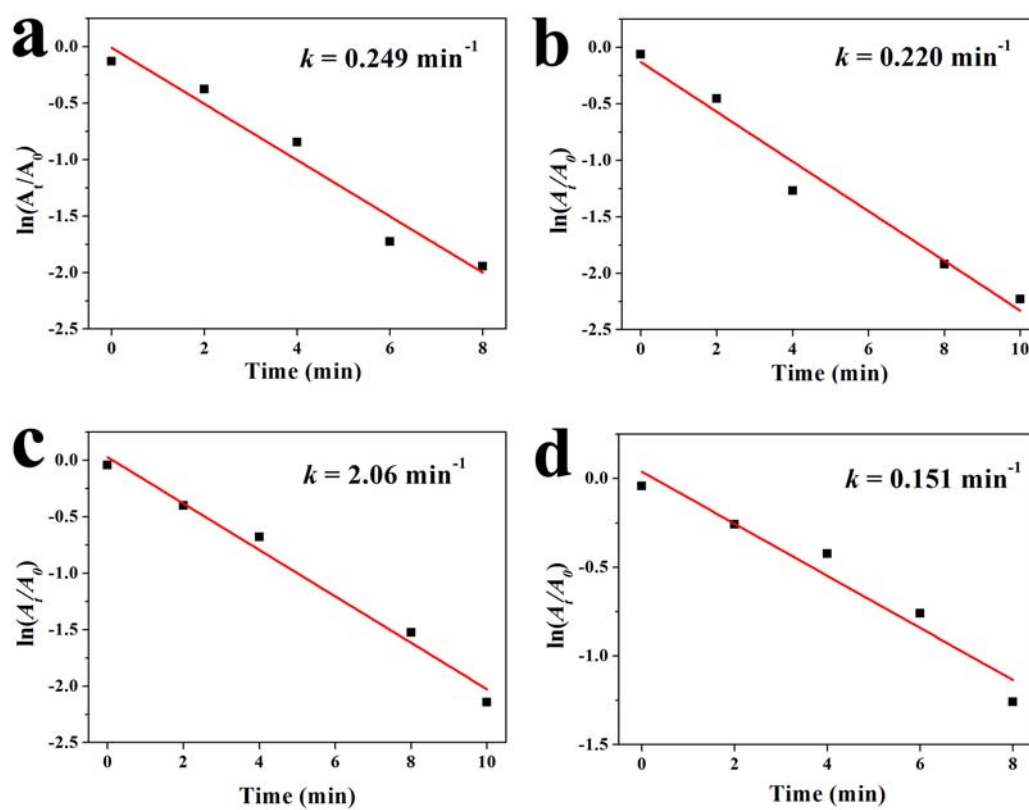

Supplement: c4nr00023d1.pdf [file c4nr00023d1.pdf]
